# Supplementary material
Source: PubMed Central journal article supplement (PMC2631410)
Supplement: NIHMS62676-supplement-1si20070716_07.pdf [file NIHMS62676-supplement-1si20070716_07.pdf]

## Regiospecific Chlorination of (*S*)- $\beta$ -Tyrosyl-S-Carrier Protein Catalyzed by SgcC3 in the Biosynthesis of the Eneidyne Antitumor Antibiotic C-1027

Shuangjun Lin,<sup>1</sup> Steven G. Van Lanen,<sup>1</sup> and Ben Shen<sup>1,2,3,\*</sup>

<sup>1</sup>Division of Pharmaceutical Sciences, <sup>2</sup>University of Wisconsin National Cooperative Drug Discovery Group, and <sup>3</sup>Department of Chemistry, University of Wisconsin-Madison, Madison, Wisconsin 53705, USA.

\*To Whom correspondence should be addressed: Division of Pharmaceutical Sciences, School of Pharmacy, University of Wisconsin-Madison, 777 Highland Ave., Madison, WI 53705. Tel.: (608) 263-2673; Fax: (608) 262-5345; E-mail: [bshen@pharmacy.wisc.edu](mailto:bshen@pharmacy.wisc.edu)

### Supporting Information

**General information.** Coenzyme A (CoA), adenosine triphosphate disodium salt (ATP), flavin adenine dinucleotide disodium salt (FAD), flavin adenine mononucleotide sodium salt dihydrate (FMN),  $\beta$ -nicotinamide adenine dinucleotide reduced disodium salt (NADH), tris(2-carboxyethyl)phosphine hydrochloride (TCEP), were purchased from Sigma-Aldrich (St. Louis, MO). IPTG and dithiothreitol was purchased from Research Products International Corp. (Mt. Prospect, IL). The starting materials for the synthesis of  $\beta$ -amino acid analogues including 3-chloro-4-hydroxybenzaldehyde, 3-chloro-4-hydroxy-5-methoxybenzaldehyde, 3-bromo-4-hydroxybenzaldehyde, 3,4-dibenzoyloxybenzaldehyde, boron tribromide and palladium (10 wt. %) on activated carbon were purchased from Sigma-Aldrich and used without further purification. (*S*)-3-Amino-3-(4-hydroxyphenyl)-propionic acid [(*S*)- $\beta$ -tyrosine] and (*R*)-3-amino-3-(4-hydroxyphenyl)-propionic acid [(*R*)- $\beta$ -tyrosine] were from PepTech Corporation (Burlington, MA). Media components and all other chemicals were from Fisher Scientific (Fairlawn, NJ). Electrospray ionization-mass spectrometry (ESI-MS) was measured with an Agilent 1100 HPLC-MSD SL ion trap mass spectrometer (Agilent Technologies, Inc., Santa Clara, CA). NMR was recorded on a Varian Unity Inova 400 or 500 MHz NMR Spectrometer (Varian, Inc., Palo Alto, CA). PCR was performed with a PerkinElmer GeneAmp 2400 (PerkinElmer Life And Analytical Sciences, Inc., Waltham, MA).

**Synthesis of 3-chloro- $\beta$ -tyrosine.** Synthesis of 3-chloro- $\beta$ -tyrosine was achieved using the method reported by Weaver.<sup>1</sup> 3-Chloro-4-hydroxybenzaldehyde (76 mg) was refluxed with 1 equivalent of malonic acid (51 mg) and 2 equivalents of ammonium acetate (76 mg) in 5 mL of ethanol for 7 hrs under an argon atmosphere. The reaction mixture was adjusted to pH 4 and separated on a strongly acidic cation-exchange column (Dowex® 50W-X8). The product, 3-chloro- $\beta$ -tyrosine, was eluted with 1% ammonium hydroxide. Solvent was removed through evaporation under reduced pressure, and the residue was dissolved in distilled water and further purified by C18-reverse phase chromatography. <sup>1</sup>H NMR (D<sub>2</sub>O - CF<sub>3</sub>CO<sub>2</sub>D, 400 MHz):  $\delta$  7.08 (d, *J* = 2.4 Hz, 1H), 6.87 (dd, *J* = 8.8, 2.4 Hz, 1H), 6.65 (d, *J* = 8.4 Hz, 1H), 4.30 (t, *J* = 7.2 Hz,

H $\beta$ , 1H), 2.77 (dd,  $J = 17.2, 7.6$  Hz, H $\alpha$ , 1H), 2.66 (dd,  $J = 17.2, 6.4$  Hz, H $\alpha$ , 1H).  $^{13}\text{C}$  NMR ( $\text{D}_2\text{O} - \text{CF}_3\text{CO}_2\text{D}$ , 100 MHz):  $\delta$  173.1 (C=O), 152.8 (ArC), 129.2 (ArC), 128.0 (ArC), 127.1 (ArC), 120.7 (ArC), 117.6 (ArC), 50.7 (C $\beta$ ), 37.5 (C $\alpha$ ). ESI-MS  $m/z$  216.0 and 218.0 for  $[\text{M} + \text{H}]^+$  and  $m/z$  213.9 and 216.0 for  $[\text{M} - \text{H}]^-$ ; calculated for  $\text{C}_9\text{H}_{10}\text{NO}_3\text{Cl}$ , 215.0 and 217.0. HRMS-ESI-MS  $m/z$  214.0263 for  $[\text{M} - \text{H}]^-$ ; calculated  $[\text{M} - \text{H}]^-$  for  $\text{C}_9\text{H}_{10}\text{NO}_3\text{Cl}$ , 214.0271.

**Synthesis of 3-bromo- $\beta$ -tyrosine.** 3-Bromo- $\beta$ -tyrosine was prepared as described above using 3-bromo-4-hydroxybenzaldehyde as starting material.  $^1\text{H}$  NMR ( $\text{D}_2\text{O} - \text{CF}_3\text{CO}_2\text{D}$ , 400 MHz):  $\delta$  7.60 (d,  $J = 2.4$  Hz, 1H), 7.27 (dd,  $J = 8.4, 2.4$  Hz, 1H), 6.99 (d,  $J = 8.4$  Hz, 1H), 4.65 (t,  $J = 7.2$  Hz, 1H), 3.11 (dd,  $J = 17.2, 8.0$  Hz, 1H), 3.00 (dd,  $J = 17.6, 6.8$  Hz, 1H).  $^{13}\text{C}$  NMR ( $\text{D}_2\text{O} - \text{CF}_3\text{CO}_2\text{D}$ , 100 MHz):  $\delta$  173.2 (C=O), 153.8 (ArC), 132.3 (ArC), 128.7 (ArC), 128.1 (ArC), 117.2 (ArC), 110.1 (ArC), 50.8 (C $\beta$ ), 37.8 (C $\alpha$ ). ESI-MS  $m/z$  260.0 and 262.0 for  $[\text{M} + \text{H}]^+$  and  $m/z$  243.0 and 245.0 for  $[\text{M} + \text{H} - \text{NH}_3]^+$ ; calculated for  $\text{C}_9\text{H}_{10}\text{NO}_3\text{Br}$ , 259.0 and 261.0. HRMS-ESI-MS  $m/z$  257.9757 for  $[\text{M} - \text{H}]^-$ ; calculated  $[\text{M} - \text{H}]^-$  for  $\text{C}_9\text{H}_{10}\text{NO}_3\text{Br}$ , 257.9766.

**Synthesis of 3-hydroxy- $\beta$ -tyrosine.** 3-Hydroxyl- $\beta$ -tyrosine was prepared as described above using 3,4-dibenzyloxybenzaldehyde as a starting material. After purification with silica chromatography, the protecting groups were removed by catalytic hydrogenation with 10% Pd/C. Benzyl alcohol was removed using C18-reverse phase chromatography to yield a light brown powder.  $^1\text{H}$  NMR ( $\text{D}_2\text{O}$ , 400MHz):  $\delta$  6.74-6.85 (m, 3H), 4.42 (t,  $J = 6.8$  Hz, H $\beta$ , 1H), 2.79 (dd,  $J = 15.6, 8.0$  Hz, H $\alpha$ , 1H), 2.69 (dd,  $J = 16.0, 6.4$  Hz, H $\alpha$ , 1H).  $^{13}\text{C}$  NMR ( $\text{D}_2\text{O}$  125 MHz):  $\delta$  177.9 (C=O) 145.5 (ArC), 145.6 (ArC), 128.7 (ArC), 119.4 (ArC), 116.6 (ArC), 115.0 (ArC), 52.7 (C $\beta$ ), 40.9 (C $\alpha$ ). ESI-MS  $m/z$  198.0 for  $[\text{M} + \text{H}]^+$  and  $m/z$  195.9 for  $[\text{M} - \text{H}]^-$ , calculated for  $\text{C}_9\text{H}_{10}\text{NO}_4$ , 197.0. HRMS-ESI-MS  $m/z$  196.0610 for  $[\text{M} - \text{H}]^-$ ; calculated  $[\text{M} - \text{H}]^-$  for  $\text{C}_9\text{H}_{10}\text{NO}_4$ , 196.0603.

**Synthesis of 3-chloro-5-hydroxy- $\beta$ -tyrosine.** 3-Chloro-4,5-dihydroxybenzaldehyde was prepared by following the procedure reported by Hua and co-workers<sup>2</sup>. To a solution containing 2.0 g of 3-chloro-4-hydroxy-5-methoxybenzaldehyde in 20 mL of dried dichloromethane was added 1.2 mL of boron tribromide. The resulting solution was stirred at 0 °C for 30 min, heated to room temperature, and incubated at room temperature for an additional 3 hrs. After removal of a trace amount of unreacted 3-chloro-4-hydroxy-5-methoxybenzaldehyde by flash silica column chromatography, the 3-chloro-4,5-dihydroxybenzaldehyde product was added to 40 mL anhydrous ethanol under argon, and was refluxed with ammonium acetate and malonic acid until all 3-chloro-4,5-dihydroxy-benzaldehyde reacted as judged by thin layer chromatography (TLC). 3-Chloro-5-hydroxy- $\beta$ -tyrosine was purified by C18-reverse phase chromatography using standard conditions.  $^1\text{H}$  NMR ( $\text{D}_2\text{O}$ , 500 MHz):  $\delta$  7.04 (d,  $J = 2.5$  Hz, 1H), 6.92 (d,  $J = 2.5$  Hz, 1H), 4.60 (t,  $J = 7.5$  Hz, 1H), 3.04 (dd,  $J = 17.0, 8.0$  Hz, 1H), 2.95 (dd,  $J = 17.0, 6.5$  Hz, 1H).  $^{13}\text{C}$  NMR ( $\text{D}_2\text{O}$ , 125 MHz):  $\delta$  175.1 (C=O), 146.1 (ArC), 141.8 (ArC), 128.6 (ArC), 121.8 (ArC), 120.2 (ArC), 113.6 (ArC), 51.6 (C $\beta$ ), 38.8 (C $\alpha$ ). ESI-MS  $m/z$  232.1 and 234.1 for  $[\text{M} + \text{H}]^+$  and  $m/z$  230.1 and 232.1 for  $[\text{M} - \text{H}]^-$ ; calculated for  $\text{C}_9\text{H}_{10}\text{NO}_4\text{Cl}$ , 231.0 and 233.0. HRMS-ESI-MS  $m/z$  230.0211 for  $[\text{M} - \text{H}]^-$ ; calculated  $[\text{M} - \text{H}]^-$  for  $\text{C}_9\text{H}_{10}\text{NO}_4\text{Cl}$ , 230.0220.

**Table S1.** Primers used for amplification of the *sgcC2*, *sgcC3*, *sgcE6*, and *E. coli fre* genes for heterologous expression.

| Name of primer             | Sequence <sup>a</sup>                       |
|----------------------------|---------------------------------------------|
| SgcC2 forward              | 5'-GACGACGACAAGATGTCCACCGTTTCCGAC-3'        |
| SgcC2 reverse              | 5'-GAGGAGAAGCCCGGTCACTGCGTTCCGGAGCC-3'      |
| SgcC3 forward              | 5'-GGTATTGAGGGTCGCATGGACGTGTCAGCGCAGTAC-3'  |
| SgcC3 reverse              | 5'-AGAGGAGAGTTAGAGTCAGGACCGCGCACCGGG-3'     |
| SgcE6 forward              | 5'-GGTATTGAGGGTCGCATGAGTCCGATCATCGCTCC-3'   |
| SgcE6 reverse              | 5'-AGAGGAGAGTTAGAGTCATGCCGCCCTTCCTTCG-3'    |
| <i>E. Coli</i> Fre forward | 5'-GGTATTGAGGGTCGCATGACAACCTTAAGCTGTAAAG-3' |
| <i>E. Coli</i> Fre reverse | 5'-AGAGGAGAGTTAGAGTCAGATAAATGCAAACGCATCG-3' |

<sup>a</sup>The start (ATG) and stop (TGA) codons are underlined.

**Figure S1.** HPLC chromatograms for determination of the FAD cofactor non-covalently bound to SgcC3: (I) FAD (♦) standard; (II) supernatant from denatured SgcC3 by heat; (III) FMN (●) standard.

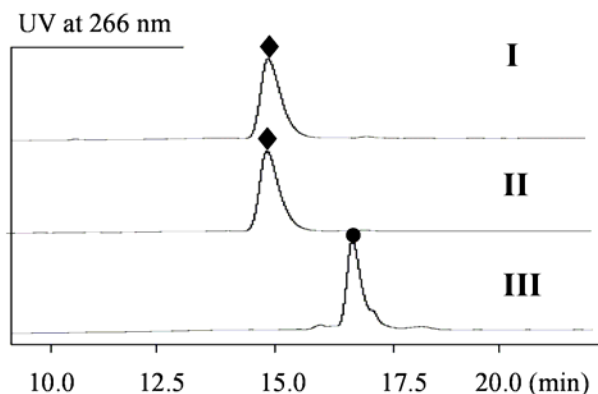

**Figure S2.** ESI-MS spectra of (*S*)-3-chloro- $\beta$ -tyrosine (**13**) released from hydrolysis of (*S*)-3-chloro- $\beta$ -tyrosyl-S-SgcC2 (**10**): (A) in positive mode showing  $[M + H]^+$  ions at  $m/z$  216 and 218 and  $[M + H - NH_3]^+$  ions at  $m/z$  199 and 201 and (B) in negative mode showing  $[M - H]^-$  ions at  $m/z$  214 and 216.

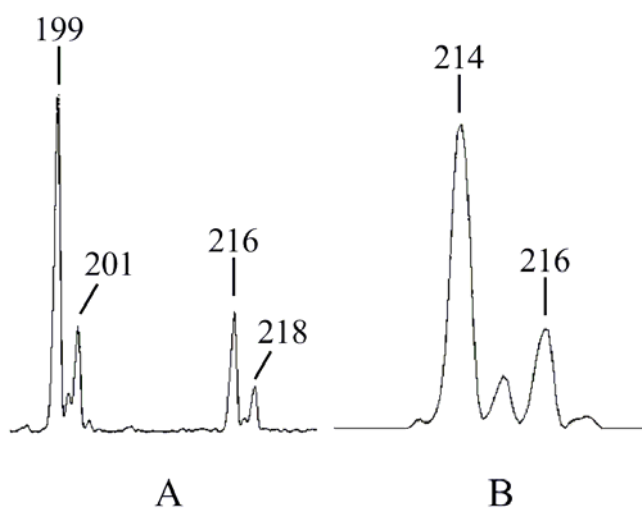



**Figure S3.** Relative activity of SgcC3 as a halogenase determined in 50 mM sodium acetate, pH 5.0 - 5.5, 50 mM sodium phosphate, pH 6.0 - 8.0, and Tris-HCl, pH 8.5 - 9.0.

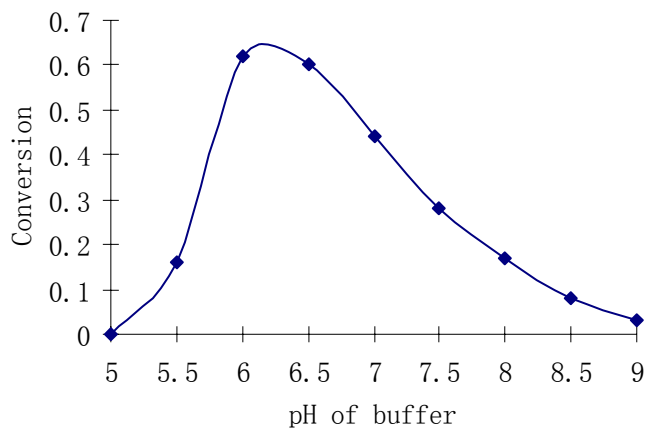

## References

- (1) Tan, C. Y. K.; Weaver, D. F. *Tetrahedron* **2002**, *58*, 7449-7461.
- (2) Hua, T. C.; Huang, X.; Chen, Y.; Battina, S. K.; Tamura, M.; Noh, S. K.; Koo, S. I.; Namatame, I.; Tomoda, H.; Perchellet, E. M.; Perchellet, J.-P. *J. Org. Chem.* **2004**, *69*, 6065-6078.
